# Supplementary material for: A device for reducing the atmosphere-induced interferences for analysis using inductively coupled plasma-mass spectrometry
Source: Royal Society of Chemistry journal article supplement (doi:10.1039/d4ja00185k), 2024-01-01
Supplement: d4ja00185k1.pdf [file d4ja00185k1.pdf]

**Table S1. Summary of oxide interference in the determination of rare earth elements**

| Elements  | Mass | Oxide interference             | Mass resolution |
|-----------|------|--------------------------------|-----------------|
| <b>La</b> | 139  | $^{123}\text{Sb}^{16}\text{O}$ | 19225           |
|           |      | $^{123}\text{Te}^{16}\text{O}$ | 19386           |
| <b>Ce</b> | 140  | $^{124}\text{Sn}^{16}\text{O}$ | 26616           |
|           |      | $^{124}\text{Te}^{16}\text{O}$ | 18182           |
| <b>Pr</b> | 141  | $^{125}\text{Te}^{16}\text{O}$ | 16968           |
| <b>Nd</b> | 146  | $^{130}\text{Te}^{16}\text{O}$ | 12177           |
|           |      | $^{130}\text{Ba}^{16}\text{O}$ | 12228           |
|           |      | $^{130}\text{Xe}^{16}\text{O}$ | 9925            |
| <b>Sm</b> | 147  | $^{131}\text{Xe}^{16}\text{O}$ | 9853            |
| <b>Eu</b> | 151  | $^{135}\text{Ba}^{16}\text{O}$ | 7832            |
|           | 153  | $^{137}\text{Ba}^{16}\text{O}$ | 7460            |
| <b>Gd</b> | 158  | $^{142}\text{Ce}^{16}\text{O}$ | 7920            |
|           |      | $^{142}\text{Nd}^{16}\text{O}$ | 7225            |
| <b>Tb</b> | 159  | $^{143}\text{Nd}^{16}\text{O}$ | 7711            |
| <b>Dy</b> | 163  | $^{147}\text{Sm}^{16}\text{O}$ | 8615            |
| <b>Ho</b> | 165  | $^{149}\text{Sm}^{16}\text{O}$ | 9051            |
| <b>Er</b> | 166  | $^{150}\text{Sm}^{16}\text{O}$ | 9166            |
| <b>Tm</b> | 169  | $^{153}\text{Eu}^{16}\text{O}$ | 9347            |
| <b>Yb</b> | 172  | $^{156}\text{Gd}^{16}\text{O}$ | 8889            |
|           |      | $^{156}\text{Dy}^{16}\text{O}$ | 10006           |
| <b>Lu</b> | 175  | $^{159}\text{Tb}^{16}\text{O}$ | 8524            |

**Table S2. Summary of oxide interference of 21 isotopes that can be tested by LA-MC-ICP-MS.**

| Elements  | Mass | Oxide interference           | Mass resolution |
|-----------|------|------------------------------|-----------------|
| <b>Li</b> | 6    |                              |                 |
|           | 7    |                              |                 |
| <b>B</b>  | 10   |                              |                 |
|           | 11   |                              |                 |
| <b>C</b>  | 12   |                              |                 |
|           | 13   |                              |                 |
| <b>Mg</b> | 24   |                              |                 |
|           | 25   |                              |                 |
|           | 26   |                              |                 |
| <b>Si</b> | 28   | $^{12}\text{C}^{16}\text{O}$ | 1557            |
|           | 29   | $^{13}\text{C}^{16}\text{O}$ | 1333            |

|           |    |                                        |      |
|-----------|----|----------------------------------------|------|
|           |    | $^{12}\text{C}^{17}\text{O}$           | 1281 |
|           | 30 | $^{12}\text{C}^{18}\text{O}$           | 1182 |
| <b>S</b>  | 32 | $^{16}\text{O}_2$                      | 1803 |
|           | 33 | $^{16}\text{O}^{17}\text{O}$           | 1461 |
|           | 34 | $^{16}\text{O}^{18}\text{O}$           | 1298 |
|           | 36 | $^{20}\text{Ne}^{16}\text{O}$          | 1776 |
| <b>Cl</b> | 35 | $^{16}\text{O}^{18}\text{O}^1\text{H}$ | 1059 |
|           |    | $^{19}\text{F}^{16}\text{O}$           | 1431 |
|           | 37 | $^{19}\text{F}^{18}\text{O}$           | 1169 |
|           |    | $^{21}\text{Ne}^{16}\text{O}$          | 1619 |
| <b>Ca</b> | 40 | $^{24}\text{Mg}^{16}\text{O}$          | 2304 |
|           | 42 | $^{26}\text{Mg}^{16}\text{O}$          | 2223 |
|           |    | $^{24}\text{Mg}^{18}\text{O}$          | 1642 |
|           | 43 | $^{27}\text{Al}^{16}\text{O}$          | 2432 |
|           | 44 | $^{12}\text{C}^{16}\text{O}_2$         | 1281 |
|           |    | $^{14}\text{N}_2^{16}\text{O}$         | 966  |
|           |    | $^{28}\text{Si}^{16}\text{O}$          | 2689 |
|           | 46 | $^{14}\text{N}^{16}\text{O}_2$         | 1173 |
|           |    | $^{28}\text{Si}^{18}\text{O}$          | 2054 |
|           |    | $^{30}\text{Si}^{16}\text{O}$          | 3069 |
|           | 48 | $^{32}\text{S}^{16}\text{O}$           | 3322 |
| <b>Ti</b> | 46 | $^{14}\text{N}^{16}\text{O}_2$         | 1143 |
|           |    | $^{15}\text{N}_2^{16}\text{O}$         | 1082 |
|           | 47 | $^{15}\text{N}^{16}\text{O}_2$         | 1231 |
|           |    | $^{31}\text{P}^{16}\text{O}$           | 2779 |
|           | 48 | $^{32}\text{S}^{16}\text{O}$           | 1948 |
|           | 49 | $^{32}\text{S}^{17}\text{O}$           | 2100 |
|           |    | $^{33}\text{S}^{16}\text{O}$           | 2649 |
|           |    | $^{31}\text{P}^{18}\text{O}$           | 1956 |
|           | 50 | $^{34}\text{S}^{16}\text{O}$           | 2779 |
|           |    | $^{32}\text{S}^{18}\text{O}$           | 1891 |
| <b>V</b>  | 50 | $^{34}\text{S}^{16}\text{O}$           | 3201 |
|           | 51 | $^{35}\text{Cl}^{16}\text{O}$          | 2576 |
| <b>Fe</b> | 54 | $^{36}\text{Ar}^{18}\text{O}$          | 2995 |
|           | 56 | $^{40}\text{Ar}^{16}\text{O}$          | 2506 |
|           |    | $^{40}\text{Ca}^{16}\text{O}$          | 2482 |
|           | 57 | $^{40}\text{Ar}^{17}\text{O}$          | 2183 |
|           | 58 | $^{40}\text{Ar}^{18}\text{O}$          | 2052 |
| <b>Ni</b> | 58 | $^{40}\text{Ar}^{18}\text{O}$          | 2215 |
|           |    | $^{40}\text{Ca}^{18}\text{O}$          | 2197 |
|           |    | $^{42}\text{Ca}^{16}\text{O}$          | 3190 |
|           | 60 | $^{44}\text{Ca}^{16}\text{O}$          | 120  |
|           | 61 | $^{45}\text{Sc}^{16}\text{O}$          | 3087 |
|           | 62 | $^{46}\text{Ti}^{16}\text{O}$          | 3231 |

|           |     |                                |        |
|-----------|-----|--------------------------------|--------|
|           | 64  | $^{48}\text{Ti}^{16}\text{O}$  | 4298   |
| <b>Cu</b> | 63  | $^{47}\text{Ti}^{16}\text{O}$  | 3691   |
|           | 65  | $^{49}\text{Ti}^{16}\text{O}$  | 4336   |
| <b>Sr</b> | 84  | $^{68}\text{Zn}^{16}\text{O}$  | 13270  |
|           | 86  | $^{70}\text{Zn}^{16}\text{O}$  | 7847   |
|           |     | $^{70}\text{Ge}^{16}\text{O}$  | 8696   |
|           | 87  | $^{71}\text{Ga}^{16}\text{O}$  | 8116   |
|           |     | $^{69}\text{Ga}^{18}\text{O}$  | 5489   |
|           | 88  | $^{72}\text{Ge}^{16}\text{O}$  | 7740   |
| <b>Zr</b> | 90  | $^{74}\text{Ge}^{16}\text{O}$  | 7909   |
|           |     | $^{74}\text{Se}^{16}\text{O}$  | 7098   |
|           | 91  | $^{75}\text{As}^{16}\text{O}$  | 8372   |
|           | 92  | $^{76}\text{Ge}^{16}\text{O}$  | 8163   |
|           |     | $^{76}\text{Se}^{16}\text{O}$  | 10132  |
|           | 94  | $^{78}\text{Kr}^{16}\text{O}$  | 10456  |
|           |     | $^{78}\text{Se}^{16}\text{O}$  | 15959  |
|           | 96  | $^{80}\text{Kr}^{16}\text{O}$  | 31788  |
|           |     | $^{80}\text{Se}^{16}\text{O}$  | 30380  |
| <b>Sn</b> | 112 | $^{96}\text{Ru}^{16}\text{O}$  | 37710  |
|           | 114 | $^{98}\text{Ru}^{16}\text{O}$  | 44186  |
|           | 115 | $^{99}\text{Ru}^{16}\text{O}$  | 46185  |
|           | 116 | $^{100}\text{Ru}^{16}\text{O}$ | 44444  |
|           | 117 | $^{101}\text{Ru}^{16}\text{O}$ | 47561  |
|           | 118 | $^{102}\text{Ru}^{16}\text{O}$ | 50213  |
|           |     | $^{102}\text{Pd}^{16}\text{O}$ | 108257 |
|           | 119 | $^{103}\text{Rh}^{16}\text{O}$ | 41034  |
|           | 120 | $^{100}\text{Ru}^{16}\text{O}$ | 64171  |
|           |     | $^{104}\text{Pd}^{16}\text{O}$ | 36810  |
|           | 122 | $^{106}\text{Pd}^{16}\text{O}$ | 24158  |
|           | 124 | $^{108}\text{Pd}^{16}\text{O}$ | 16940  |
| <b>Hf</b> | 174 | $^{158}\text{Gd}^{16}\text{O}$ | 8266   |
|           | 176 | $^{160}\text{Gd}^{16}\text{O}$ | 9049   |
|           |     | $^{160}\text{Dy}^{16}\text{O}$ | 8259   |
|           | 177 | $^{161}\text{Dy}^{16}\text{O}$ | 8279   |
|           | 178 | $^{162}\text{Dy}^{16}\text{O}$ | 8095   |
|           |     | $^{162}\text{Er}^{16}\text{O}$ | 8896   |
|           | 179 | $^{163}\text{Dy}^{16}\text{O}$ | 8070   |
|           | 180 | $^{164}\text{Dy}^{16}\text{O}$ | 8011   |
|           |     | $^{164}\text{Er}^{16}\text{O}$ | 8021   |
| <b>Os</b> | 184 | $^{168}\text{Yb}^{16}\text{O}$ | 7767   |
|           |     | $^{168}\text{Er}^{16}\text{O}$ | 7296   |
|           | 186 | $^{170}\text{Yb}^{16}\text{O}$ | 7695   |
|           |     | $^{170}\text{Er}^{16}\text{O}$ | 7928   |
|           | 187 | $^{171}\text{Yb}^{16}\text{O}$ | 7630   |

|           |     |                                |       |
|-----------|-----|--------------------------------|-------|
|           |     | $^{169}\text{Tm}^{18}\text{O}$ | 8359  |
|           | 188 | $^{172}\text{Yb}^{16}\text{O}$ | 7658  |
|           | 189 | $^{173}\text{Yb}^{16}\text{O}$ | 7551  |
|           | 190 | $^{174}\text{Yb}^{16}\text{O}$ | 7699  |
|           |     | $^{174}\text{Hf}^{16}\text{O}$ | 8092  |
|           | 192 | $^{176}\text{Yb}^{16}\text{O}$ | 8000  |
|           |     | $^{176}\text{Hf}^{16}\text{O}$ | 7631  |
|           |     | $^{176}\text{Lu}^{16}\text{O}$ | 8037  |
| <b>Pb</b> | 204 | $^{188}\text{Os}^{16}\text{O}$ | 8979  |
|           | 206 | $^{190}\text{Os}^{16}\text{O}$ | 9768  |
|           | 207 | $^{191}\text{Ir}^{16}\text{O}$ | 10157 |
|           | 208 | $^{192}\text{Pt}^{16}\text{O}$ | 10058 |
|           |     | $^{192}\text{Os}^{16}\text{O}$ | 10277 |
| <b>Nd</b> | 142 | $^{126}\text{Te}^{16}\text{O}$ | 14932 |
|           | 143 | $^{127}\text{I}^{16}\text{O}$  | 13710 |
|           | 144 | $^{128}\text{Xe}^{16}\text{O}$ | 12350 |
|           |     | $^{128}\text{Te}^{16}\text{O}$ | 13420 |
|           | 145 | $^{129}\text{Xe}^{16}\text{O}$ | 11249 |
|           |     | $^{127}\text{I}^{18}\text{O}$  | 16219 |
|           | 146 | $^{130}\text{Ba}^{16}\text{O}$ | 12228 |
|           |     | $^{130}\text{Te}^{16}\text{O}$ | 12177 |
|           | 148 | $^{132}\text{Xe}^{16}\text{O}$ | 8296  |
|           | 150 | $^{134}\text{Xe}^{16}\text{O}$ | 7285  |
|           |     | $^{134}\text{Ba}^{16}\text{O}$ | 6977  |
| <b>U</b>  | 234 |                                |       |
|           | 235 |                                |       |
|           | 238 |                                |       |

---

**Table S3. The  $^{82}\text{Kr}$  and interferences signal intensity with changes of Ar shielding gas flow rate with AIRD**

| Intensity<br>(cps)<br>Flow rate<br>(L min <sup>-1</sup> ) | $^{82}\text{Kr}$ | $^{12}\text{C}$ | $^{15}\text{N}$ | $^{16}\text{O}$ | $^{18}\text{OHH}$ | $^{40}\text{Ar}^{14}\text{N}$ | $^{40}\text{Ar}^{16}\text{O}$ |
|-----------------------------------------------------------|------------------|-----------------|-----------------|-----------------|-------------------|-------------------------------|-------------------------------|
| 0                                                         | 1.92E+08         | 2.16E+06        | 1.20E+06        | 2.84E+08        | 5.59E+07          | 1.38E+05                      | 3.24E+04                      |
| 1                                                         | 1.99E+08         | 2.19E+06        | 1.05E+06        | 2.39E+08        | 4.50E+07          | 1.15E+05                      | 2.61E+04                      |
| 2                                                         | 2.02E+08         | 1.99E+06        | 8.80E+05        | 1.97E+08        | 4.40E+07          | 9.31E+04                      | 2.24E+04                      |
| 3                                                         | 2.01E+08         | 1.97E+06        | 7.75E+05        | 1.69E+08        | 4.00E+07          | 8.13E+04                      | 1.97E+04                      |
| 4                                                         | 2.01E+08         | 2.00E+06        | 7.32E+05        | 1.59E+08        | 3.93E+07          | 7.66E+04                      | 1.89E+04                      |
| 5                                                         | 2.02E+08         | 1.98E+06        | 6.88E+05        | 1.48E+08        | 3.78E+07          | 7.08E+04                      | 1.77E+04                      |
| 6                                                         | 2.01E+08         | 1.97E+06        | 6.45E+05        | 1.37E+08        | 3.61E+07          | 6.59E+04                      | 1.67E+04                      |
| 7                                                         | 1.96E+08         | 2.04E+06        | 7.21E+05        | 1.57E+08        | 3.88E+07          | 7.41E+04                      | 1.83E+04                      |
| 8                                                         | 1.51E+08         | 1.60E+06        | 4.96E+05        | 1.04E+08        | 2.58E+07          | 5.76E+04                      | 1.87E+04                      |
| 9                                                         | 1.47E+08         | 1.69E+06        | 5.14E+05        | 1.08E+08        | 2.58E+07          | 6.02E+04                      | 1.96E+04                      |
| 10                                                        | 1.45E+08         | 1.86E+06        | 5.66E+05        | 1.19E+08        | 2.46E+07          | 6.66E+04                      | 2.01E+04                      |
| 11                                                        | 1.32E+08         | 2.15E+06        | 6.68E+05        | 1.45E+08        | 3.11E+07          | 7.91E+04                      | 2.44E+04                      |
| 12                                                        | 1.19E+08         | 2.32E+06        | 8.72E+05        | 1.97E+08        | 3.56E+07          | 1.04E+05                      | 3.04E+04                      |
| 13                                                        | 1.07E+08         | 2.47E+06        | 1.03E+06        | 2.33E+08        | 4.04E+07          | 1.22E+05                      | 3.57E+04                      |
| 14                                                        | 1.03E+08         | 3.12E+06        | 1.23E+06        | 2.83E+08        | 4.62E+07          | 1.50E+05                      | 4.21E+04                      |
| 15                                                        | 1.01E+08         | 3.73E+06        | 1.41E+06        | 3.26E+08        | 4.92E+07          | 1.72E+05                      | 4.68E+04                      |

**Table S4. The  $^{82}\text{Kr}$  and interferences signal intensity with changes of He shielding gas flow rate with AIRD**

| Intensity<br>(cps)<br>Flow rate<br>(L min <sup>-1</sup> ) | $^{82}\text{Kr}$ | $^{12}\text{C}$ | $^{15}\text{N}$ | $^{16}\text{O}$ | $^{18}\text{OHH}$ | $^{40}\text{Ar}^{14}\text{N}$ | $^{40}\text{Ar}^{16}\text{O}$ |
|-----------------------------------------------------------|------------------|-----------------|-----------------|-----------------|-------------------|-------------------------------|-------------------------------|
| 0                                                         | 1.91E+08         | 2.39E+06        | 1.17E+06        | 2.78E+08        | 5.47E+07          | 1.34E+05                      | 3.21E+04                      |
| 1                                                         | 1.42E+08         | 1.92E+06        | 8.39E+05        | 1.90E+08        | 3.55E+07          | 1.01E+05                      | 2.87E+04                      |
| 2                                                         | 1.47E+08         | 1.80E+06        | 7.86E+05        | 1.77E+08        | 3.04E+07          | 9.42E+04                      | 2.58E+04                      |
| 3                                                         | 1.51E+08         | 1.64E+06        | 7.28E+05        | 1.65E+08        | 2.95E+07          | 8.77E+04                      | 2.43E+04                      |
| 4                                                         | 1.49E+08         | 1.52E+06        | 6.75E+05        | 1.56E+08        | 3.21E+07          | 8.06E+04                      | 2.36E+04                      |
| 5                                                         | 1.50E+08         | 1.51E+06        | 6.56E+05        | 1.51E+08        | 3.11E+07          | 7.77E+04                      | 2.27E+04                      |
| 6                                                         | 1.48E+08         | 1.48E+06        | 6.58E+05        | 1.51E+08        | 3.07E+07          | 7.81E+04                      | 2.29E+04                      |
| 7                                                         | 1.48E+08         | 1.43E+06        | 6.17E+05        | 1.40E+08        | 2.92E+07          | 7.28E+04                      | 2.16E+04                      |
| 8                                                         | 1.51E+08         | 1.41E+06        | 5.82E+05        | 1.31E+08        | 2.76E+07          | 6.87E+04                      | 2.02E+04                      |
| 9                                                         | 1.55E+08         | 1.37E+06        | 5.21E+05        | 1.13E+08        | 2.47E+07          | 6.01E+04                      | 1.78E+04                      |
| 10                                                        | 1.57E+08         | 1.34E+06        | 4.73E+05        | 1.00E+08        | 2.24E+07          | 5.40E+04                      | 1.61E+04                      |
| 11                                                        | 1.58E+08         | 1.34E+06        | 4.81E+05        | 1.00E+08        | 2.07E+07          | 5.43E+04                      | 1.55E+04                      |
| 12                                                        | 1.56E+08         | 1.33E+06        | 4.99E+05        | 1.05E+08        | 2.04E+07          | 5.72E+04                      | 1.61E+04                      |
| 13                                                        | 1.55E+08         | 1.32E+06        | 5.19E+05        | 1.11E+08        | 2.16E+07          | 6.00E+04                      | 1.69E+04                      |
| 14                                                        | 1.53E+08         | 1.40E+06        | 5.49E+05        | 1.23E+08        | 2.66E+07          | 6.40E+04                      | 1.89E+04                      |
| 15                                                        | 1.50E+08         | 1.39E+06        | 5.57E+05        | 1.26E+08        | 2.73E+07          | 6.50E+04                      | 1.93E+04                      |

**Table S5. The  $^{82}\text{Kr}$  and interferences signal intensity with changes of carrier gas flow rate with AIRD**

| Intensity<br>(cps)<br>Flow rate<br>(L min <sup>-1</sup> ) | $^{82}\text{Kr}$ | $^{12}\text{C}$ | $^{15}\text{N}$ | $^{16}\text{O}$ | $^{18}\text{OHH}$ | $^{40}\text{Ar}^{14}\text{N}$ | $^{40}\text{Ar}^{16}\text{O}$ |
|-----------------------------------------------------------|------------------|-----------------|-----------------|-----------------|-------------------|-------------------------------|-------------------------------|
| 0.2                                                       | 1.40E+07         | 1.01E+05        | 9.17E+04        | 1.79E+07        | 6.03E+06          | 6.62E+03                      | 8.52E+03                      |
| 0.3                                                       | 1.54E+07         | 1.05E+05        | 8.74E+04        | 1.70E+07        | 6.01E+06          | 6.25E+03                      | 7.14E+03                      |
| 0.4                                                       | 1.74E+07         | 1.19E+05        | 8.88E+04        | 1.74E+07        | 6.18E+06          | 6.51E+03                      | 6.27E+03                      |
| 0.5                                                       | 4.48E+07         | 3.75E+05        | 2.48E+05        | 5.07E+07        | 1.48E+07          | 1.71E+04                      | 9.08E+03                      |
| 0.6                                                       | 1.44E+08         | 9.38E+05        | 5.24E+05        | 1.10E+08        | 2.91E+07          | 4.35E+04                      | 1.47E+04                      |
| 0.7                                                       | 1.97E+08         | 1.30E+06        | 6.30E+05        | 1.34E+08        | 3.15E+07          | 6.08E+04                      | 1.71E+04                      |
| 0.8                                                       | 1.79E+08         | 1.29E+06        | 5.48E+05        | 1.16E+08        | 2.36E+07          | 6.10E+04                      | 1.64E+04                      |
| 0.9                                                       | 1.41E+08         | 1.40E+06        | 4.73E+05        | 1.02E+08        | 2.22E+07          | 5.74E+04                      | 1.51E+04                      |
| 1                                                         | 1.16E+08         | 1.64E+06        | 4.52E+05        | 9.92E+07        | 1.92E+07          | 5.70E+04                      | 1.30E+04                      |
| 1.1                                                       | 9.86E+07         | 2.26E+06        | 4.69E+05        | 1.08E+08        | 1.80E+07          | 6.34E+04                      | 1.11E+04                      |
| 1.2                                                       | 8.62E+07         | 3.48E+06        | 5.12E+05        | 1.22E+08        | 1.83E+07          | 7.87E+04                      | 9.66E+03                      |

**Table S6. The  $^{82}\text{Kr}$  and interferences signal intensity with changes of carrier gas flow rate without AIRD**

| Intensity<br>(cps)<br>Flow rate<br>(L min <sup>-1</sup> ) | $^{82}\text{Kr}$ | $^{12}\text{C}$ | $^{15}\text{N}$ | $^{16}\text{O}$ | $^{18}\text{OHH}$ | $^{40}\text{Ar}^{14}\text{N}$ | $^{40}\text{Ar}^{16}\text{O}$ |
|-----------------------------------------------------------|------------------|-----------------|-----------------|-----------------|-------------------|-------------------------------|-------------------------------|
| 0.2                                                       | 4.20E+06         | 4.98E+04        | 6.86E+04        | 1.38E+07        | 3.66E+06          | 6.71E+03                      | 1.24E+04                      |
| 0.3                                                       | 4.77E+06         | 6.01E+04        | 7.78E+04        | 1.66E+07        | 4.33E+06          | 7.00E+03                      | 1.17E+04                      |
| 0.4                                                       | 5.02E+06         | 7.93E+04        | 9.33E+04        | 2.08E+07        | 5.40E+06          | 7.20E+03                      | 1.11E+04                      |
| 0.5                                                       | 1.21E+07         | 3.07E+05        | 3.17E+05        | 7.32E+07        | 1.81E+07          | 2.11E+04                      | 1.43E+04                      |
| 0.6                                                       | 3.46E+07         | 5.79E+05        | 5.22E+05        | 1.27E+08        | 3.21E+07          | 4.33E+04                      | 1.68E+04                      |
| 0.7                                                       | 7.55E+07         | 1.22E+06        | 9.40E+05        | 2.30E+08        | 5.10E+07          | 9.08E+04                      | 2.49E+04                      |
| 0.8                                                       | 1.46E+08         | 2.47E+06        | 1.64E+06        | 4.09E+08        | 8.42E+07          | 1.84E+05                      | 4.21E+04                      |
| 0.9                                                       | 1.26E+08         | 2.24E+06        | 1.29E+06        | 3.48E+08        | 7.55E+07          | 1.68E+05                      | 3.74E+04                      |
| 1                                                         | 8.72E+07         | 2.22E+06        | 9.69E+05        | 2.76E+08        | 5.77E+07          | 1.44E+05                      | 2.97E+04                      |
| 1.1                                                       | 6.52E+07         | 2.66E+06        | 8.26E+05        | 2.47E+08        | 4.61E+07          | 1.46E+05                      | 2.49E+04                      |
| 1.2                                                       | 5.26E+07         | 4.16E+06        | 7.76E+05        | 2.46E+08        | 3.93E+07          | 1.80E+05                      | 2.22E+04                      |
